# Supplementary material for: Reinitialised versus continuous regional climate simulations using ALARO-0 coupled to the land surface model SURFEX
Source: Copernicus journal article supplement (doi:10.5194/gmd-2016-154), 2016-08-09
Supplement: Supplementary file [file gmd-2016-154-AC3-supplement.zip]

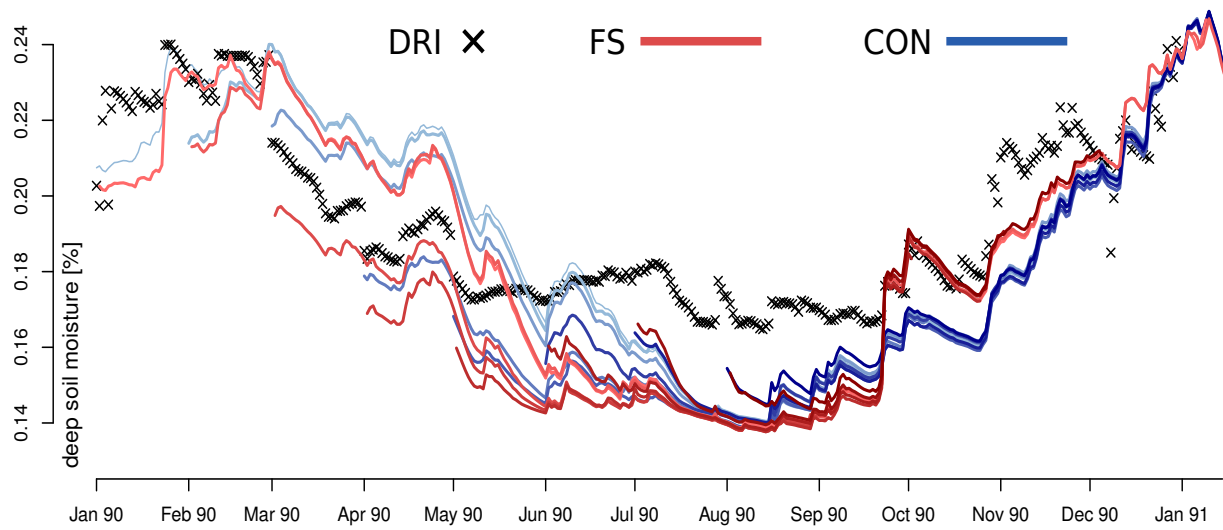

**Figure 1.** Deep soil moisture January 1990 to January 1991 for CON, DRI and FS for domain covering Belgium and neighbouring countries at 4 km horizontal resolution

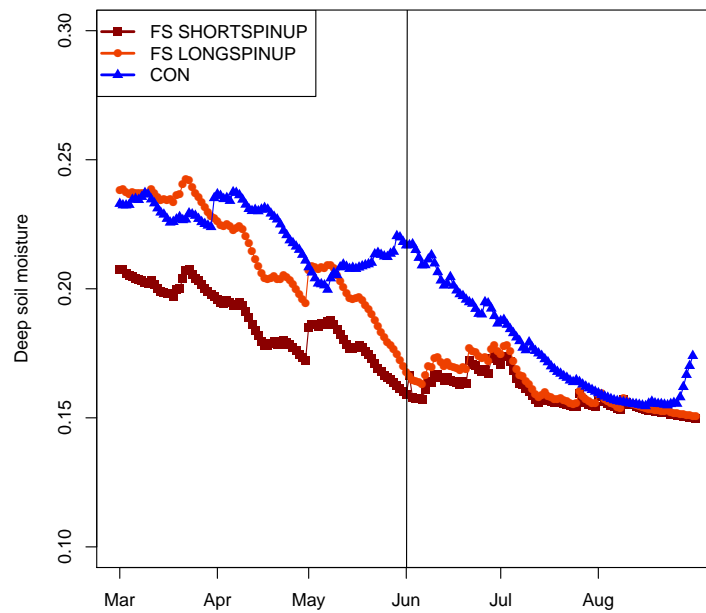

**Figure 2.** Deep soil moisture March 1991 to August 1991 for CON and FS for our study domain at 20 km horizontal resolution.
